# Supplementary material for: Impacts of PbI2 on high-efficiency perovskite solar cells: exploring intercalation orientations and defects
Source: Royal Society of Chemistry journal article supplement (doi:10.1039/d3tc02770h), 2023-01-01
Supplement: d3tc02770h1.pdf [file d3tc02770h1.pdf]

## Supplementary Information

### Impacts of PbI<sub>2</sub> on High-Efficiency Perovskite Solar Cells: Exploring Intercalation Orientations and Defects

Feifei Ren,<sup>a</sup> Huiwen Xiang,<sup>a</sup> Ke Zhao,<sup>b</sup> Chengyan Liu<sup>a\*</sup>

<sup>a</sup> Henan Key Laboratory of Photovoltaic Materials, Key Laboratory for Special Functional Materials of Ministry of Education, Henan University, Kaifeng 475004, China

<sup>b</sup> International Laboratory for Quantum Functional Materials of Henan, and School of Physics and Microelectronics, Zhengzhou University, Zhengzhou 450001, China

#### 1. The construction of PbI<sub>2</sub>/CsPbI<sub>3</sub> heterojunctions

**Table S1** The PbI<sub>2</sub>/CsPbI<sub>3</sub> heterojunctions constructed by the (0 0 1) plane of PbI<sub>2</sub> interfaced with the various low-index planes of CsPbI<sub>3</sub>, with different surface terminations at the heterointerfaces. The table includes the representations of the heterointerfaces, orientations of lattice vectors, lattice constants and lattice mismatch errors.

| Heterointerface                                      | PbI <sub>2</sub>          |                    | CsPbI <sub>3</sub>         |                            | Lattice matching (Å)                                   | Error (%)           |                     |
|------------------------------------------------------|---------------------------|--------------------|----------------------------|----------------------------|--------------------------------------------------------|---------------------|---------------------|
|                                                      | <i>a</i> (Å)              | <i>b</i> (Å)       | <i>u</i> (Å)               | <i>v</i> (Å)               |                                                        | <i>a</i> : <i>u</i> | <i>b</i> : <i>v</i> |
| PbI <sub>2</sub> (0 0 1)//CsPbI <sub>3</sub> (1 0 0) | $\sqrt{3}a'_0$<br>[1 2 0] | $a'_0$<br>[2 -1 0] | $a_0$<br>[0 1 0]           | $a_0$<br>[0 0 1]           | $(3a, 4b)//(4u, 3v)$<br>(24.32, 18.72)//(25.53, 19.15) | 4.74                | 2.25                |
| PbI <sub>2</sub> (0 0 1)//CsPbI <sub>3</sub> (1 1 0) | $\sqrt{3}a'_0$<br>[1 2 0] | $a'_0$<br>[2 -1 0] | $a_0$<br>[0 0 1]           | $\sqrt{2}a_0$<br>[1 -1 0]  | $(3a, 2b)//(4u, v)$<br>(24.32, 9.36)//(25.53, 9.03)    | 4.74                | 3.77                |
| PbI <sub>2</sub> (0 0 1)//CsPbI <sub>3</sub> (1 3 0) | $\sqrt{3}a'_0$<br>[1 2 0] | $a'_0$<br>[2 -1 0] | $a_0$<br>[0 0 1]           | $\sqrt{10}a_0$<br>[3 -1 0] | $(3a, 4b)//(4u, v)$<br>(24.32, 18.72)//(25.53, 20.19)  | 4.74                | 7.28                |
| PbI <sub>2</sub> (0 0 1)//CsPbI <sub>3</sub> (1 1 1) | $\sqrt{3}a'_0$<br>[1 2 0] | $a'_0$<br>[2 -1 0] | $\sqrt{6}a_0$<br>[2 -1 -1] | $\sqrt{2}a_0$<br>[0 1 -1]  | $(2a, 2b)//(u, v)$<br>(16.21, 9.36)//(15.64, 9.03)     | 3.64                | 3.65                |
| PbI <sub>2</sub> (0 0 1)//CsPbI <sub>3</sub> (1 1 2) | $\sqrt{3}a'_0$<br>[1 2 0] | $a'_0$<br>[2 -1 0] | $\sqrt{3}a_0$<br>[1 1 -1]  | $\sqrt{2}a_0$<br>[1 -1 0]  | $(4a, 2b)//(3u, v)$<br>(32.42, 9.36)//(33.17, 9.03)    | 2.26                | 3.65                |

**Table S2** The PbI<sub>2</sub>⊥CsPbI<sub>3</sub> heterojunctions constructed by the (1 2 0) plane of PbI<sub>2</sub> interfaced with the various low-index planes of CsPbI<sub>3</sub>, with different surface terminations at the heterointerfaces. The table includes the representations of the heterointerfaces, orientations of lattice vectors, lattice constants and lattice mismatch errors.

| Heterointerface                                     | PbI <sub>2</sub>   |                   | CsPbI <sub>3</sub>         |                            | Lattice matching (Å)                                 | Error (%)           |                     |
|-----------------------------------------------------|--------------------|-------------------|----------------------------|----------------------------|------------------------------------------------------|---------------------|---------------------|
|                                                     | <i>a</i> (Å)       | <i>b</i> (Å)      | <i>u</i> (Å)               | <i>v</i> (Å)               |                                                      | <i>a</i> : <i>u</i> | <i>b</i> : <i>v</i> |
| PbI <sub>2</sub> (1 2 0)⊥CsPbI <sub>3</sub> (1 0 0) | $a'_0$<br>[2 -1 0] | $c'_0$<br>[0 0 1] | $a_0$<br>[0 1 0]           | $a_0$<br>[0 0 1]           | $(4a, 4b)⊥(3u, 5v)$<br>(18.72, 31.58)⊥(19.15, 31.92) | 2.30                | 1.07                |
| PbI <sub>2</sub> (1 2 0)⊥CsPbI <sub>3</sub> (1 1 0) | $a'_0$<br>[2 -1 0] | $c'_0$<br>[0 0 1] | $a_0$<br>[0 0 1]           | $\sqrt{2}a_0$<br>[1 -1 0]  | $(4b, 2a)⊥(5u, v)$<br>(31.58, 9.36) ⊥ (31.92, 9.03)  | 1.07                | 3.65                |
| PbI <sub>2</sub> (1 2 0)⊥CsPbI <sub>3</sub> (1 3 0) | $a'_0$<br>[2 -1 0] | $c'_0$<br>[0 0 1] | $a_0$<br>[0 0 1]           | $\sqrt{10}a_0$<br>[3 -1 0] | $(4a, 5b)⊥(3u, 2v)$<br>(18.72, 39.48)⊥(19.15, 40.38) | 2.30                | 2.20                |
| PbI <sub>2</sub> (1 2 0)⊥CsPbI <sub>3</sub> (1 1 1) | $a'_0$<br>[2 -1 0] | $c'_0$<br>[0 0 1] | $\sqrt{6}a_0$<br>[2 -1 -1] | $\sqrt{2}a_0$<br>[0 1 -1]  | $(2b, 2a)⊥(u, v)$<br>(15.79, 9.36)⊥(15.64, 9.03)     | 0.96                | 3.65                |
| PbI <sub>2</sub> (1 2 0)⊥CsPbI <sub>3</sub> (1 1 2) | $a'_0$<br>[2 -1 0] | $c'_0$<br>[0 0 1] | $\sqrt{3}a_0$<br>[1 1 -1]  | $\sqrt{2}a_0$<br>[1 -1 0]  | $(4b, 2a)⊥(3u, v)$<br>(31.58, 9.36)⊥(33.17, 9.03)    | 4.79                | 3.65                |

#### 2. Heterojunction structures

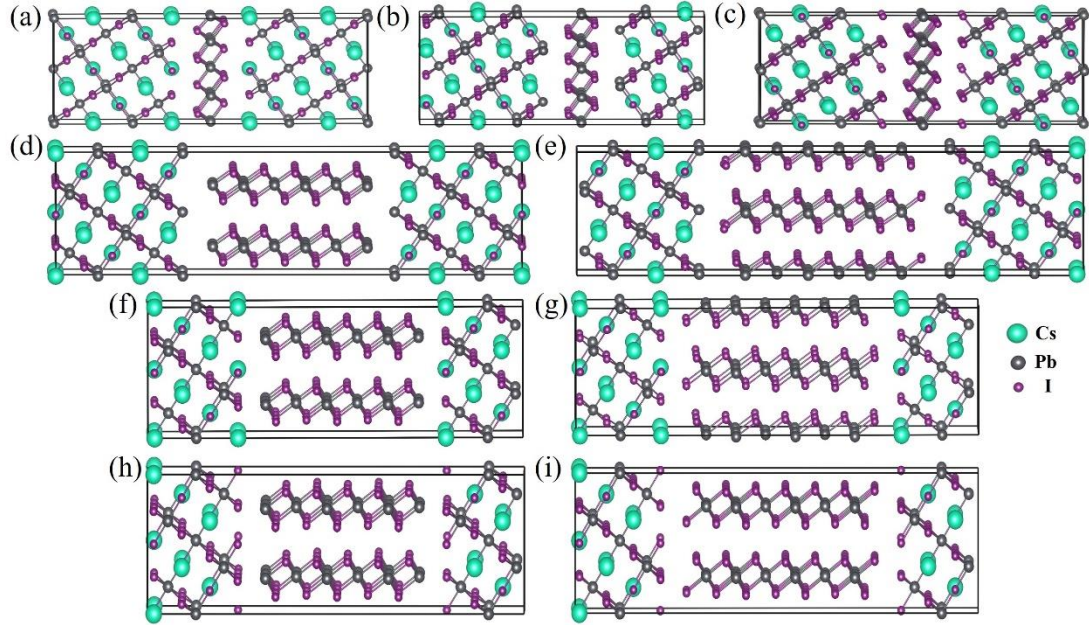

**Fig. S1** The initial heterojunctions constructed based on the intercalation orientations of  $\text{PbI}_2$  interfaced with the (1 1 1) plane of perovskite with the various surface terminations at heterointerface. (a)  $\text{PbI}_2//\text{CsPbI}_3\text{-CsI}$ , (b)  $\text{PbI}_2//\text{CsPbI}_3\text{-I}$ , (c)  $\text{PbI}_2//\text{CsPbI}_3\text{-Pb}$ , (d)  $\text{PbI}_2\text{-Pb}\perp\text{CsPbI}_3\text{-Pb}$ , (e)  $\text{PbI}_2\text{-I}\perp\text{CsPbI}_3\text{-Pb}$ , (f)  $\text{PbI}_2\text{-Pb}\perp\text{CsPbI}_3\text{-CsI}$ , (g)  $\text{PbI}_2\text{-I}\perp\text{CsPbI}_3\text{-CsI}$ , (h)  $\text{PbI}_2\text{-Pb}\perp\text{CsPbI}_3\text{-I}$ , (i)  $\text{PbI}_2\text{-I}\perp\text{CsPbI}_3\text{-I}$ . The atoms colored by cyan, grey and purple represent Cs, Pb and I, respectively.

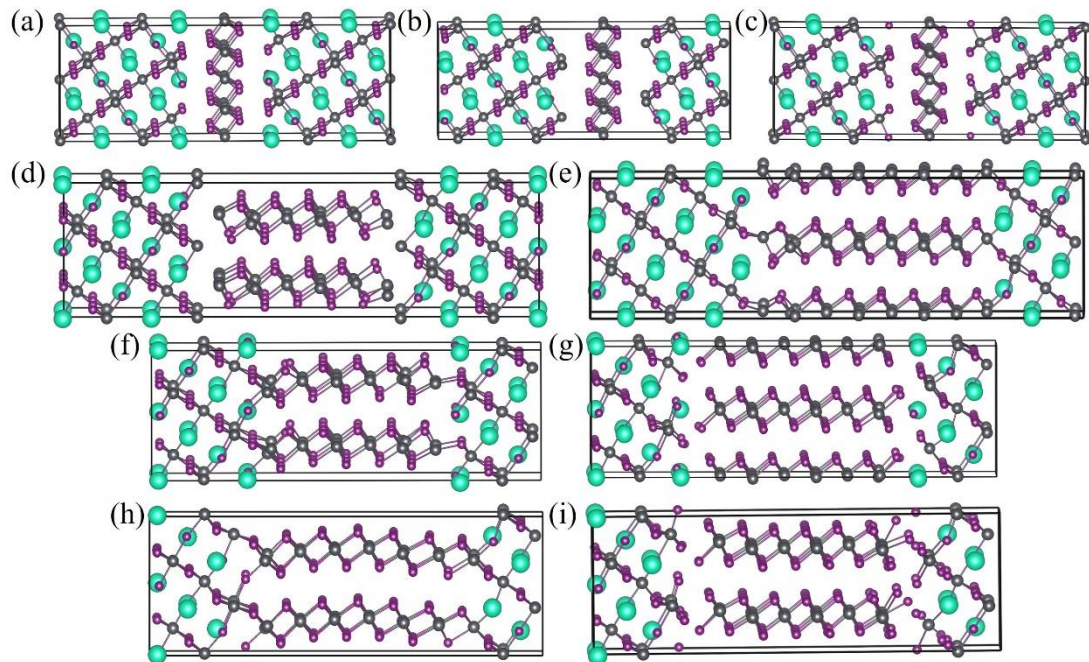

**Fig. S2** The relaxed heterojunctions corresponding to those in Figure S1. (a)  $\text{PbI}_2//\text{CsPbI}_3\text{-CsI}$ , (b)  $\text{PbI}_2//\text{CsPbI}_3\text{-I}$ , (c)  $\text{PbI}_2//\text{CsPbI}_3\text{-Pb}$ , (d)  $\text{PbI}_2\text{-Pb}\perp\text{CsPbI}_3\text{-Pb}$ , (e)  $\text{PbI}_2\text{-I}\perp\text{CsPbI}_3\text{-Pb}$ , (f)  $\text{PbI}_2\text{-Pb}\perp\text{CsPbI}_3\text{-CsI}$ , (g)  $\text{PbI}_2\text{-I}\perp\text{CsPbI}_3\text{-CsI}$ , (h)  $\text{PbI}_2\text{-Pb}\perp\text{CsPbI}_3\text{-I}$ , (i)  $\text{PbI}_2\text{-I}\perp\text{CsPbI}_3\text{-I}$ .

### 3. Band alignment calculations

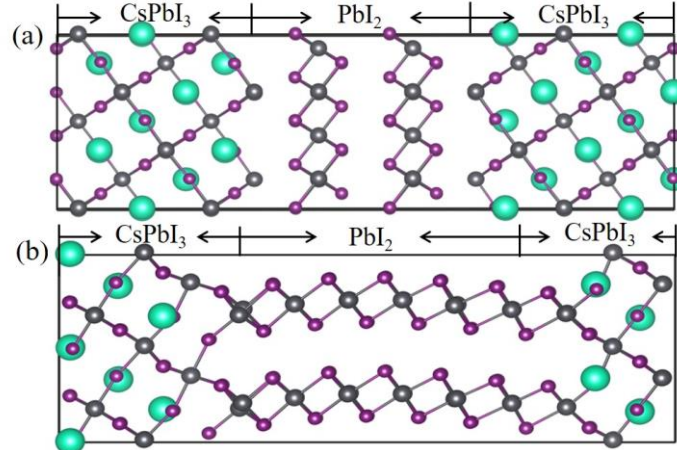

**Fig. S3** Atomic structures of (a)  $\text{PbI}_2//\text{CsPbI}_3\text{-Pb}$  and (b)  $\text{PbI}_2\text{-Pb}\perp\text{CsPbI}_3\text{-I}$  heterojunctions with two layers of  $\text{PbI}_2$  parallelly and vertically interfaced with the (1 1 1) plane of  $\text{CsPbI}_3$ , respectively.

The absolute deformation potential (ADP) method is used to calculate the band alignment between  $\text{CsPbI}_3$  and  $\text{PbI}_2$ .<sup>S1</sup> The average 1s core level of the iodine atoms that are far away from the interface of heterojunctions is employed as the reference level. The calculation steps are shown schematically in Fig. S4. To obtain the natural valence band offset of  $\text{CsPbI}_3$  and  $\text{PbI}_2$  at their respective equilibrium lattice constants, we firstly calculate the difference in energy separation between the core level and the valence band maximum (VBM) of  $\text{CsPbI}_3$  and  $\text{PbI}_2$  at their averaged volume.

$$\Delta E_{v,\text{core}}^{(\text{av})}(\text{PbI}_2/\text{CsPbI}_3) = \Delta E_{v,\text{c}}^{(\text{av})}(\text{CsPbI}_3) - \Delta E_{v,\text{c}}^{(\text{av})}(\text{PbI}_2) \quad (\text{S1})$$

where  $\Delta E_{v,\text{c}}^{(\text{av})}(\text{CsPbI}_3)$  and  $\Delta E_{v,\text{c}}^{(\text{av})}(\text{PbI}_2)$  represent the energy separation between the core level and VBM of  $\text{CsPbI}_3$  and  $\text{PbI}_2$  at their averaged volume, respectively, by performing separate bulk calculations. To align the reference levels of  $\text{CsPbI}_3$  and  $\text{PbI}_2$ , we construct the  $(\text{PbI}_2)_{16}/(\text{CsPbI}_3)_{18}$  and  $(\text{PbI}_2)_{24}\perp(\text{CsPbI}_3)_{14}$  superlattices at the average lattice constants of the interfaces. The slab thickness is carefully checked with the valence band offset convergence to less than 0.02 eV. The difference of core levels  $\Delta E_{\text{C,C}'}^{(\text{av})}$  between  $\text{PbI}_2$  and  $\text{CsPbI}_3$  in each half of the superlattice is derived by

$$\Delta E_{\text{C,C}'}^{(\text{av})}(\text{PbI}_2/\text{CsPbI}_3) = E_{\text{C}}(\text{CsPbI}_3) - E_{\text{C}}(\text{PbI}_2) \quad (\text{S2})$$

Combining with the equations (S1) and (S2), the valence band offset  $\Delta E_v^{(\text{av})}$  at their averaged lattice constants is given by

$$\Delta E_v^{(\text{av})}(\text{PbI}_2/\text{CsPbI}_3) = \Delta E_{v,\text{core}}^{(\text{av})}(\text{PbI}_2/\text{CsPbI}_3) + \Delta E_{\text{C,C}'}^{(\text{av})}(\text{PbI}_2/\text{CsPbI}_3) \quad (\text{S3})$$

The volume deformation which is used to accommodate the construction of the heterojunction is accounted for the correction of the valence band. The final natural band alignment  $\Delta E_v$  can be obtained by

$$\Delta E_v(\text{PbI}_2/\text{CsPbI}_3) = \Delta E_v^{(\text{av})}(\text{PbI}_2/\text{CsPbI}_3) + a_v^{\text{VBM}}(\text{PbI}_2) d \ln V(\text{PbI}_2) + a_v^{\text{VBM}}(\text{CsPbI}_3) d \ln V(\text{CsPbI}_3) \quad (\text{S4})$$

where  $a_v^{\text{VBM}}$  is the change in the VBM under a hydrostatic volume deformation.  $d \ln V = \Delta V / V$  is the relative volume difference between the equilibrium systems of  $\text{PbI}_2$  and  $\text{CsPbI}_3$  and their average.

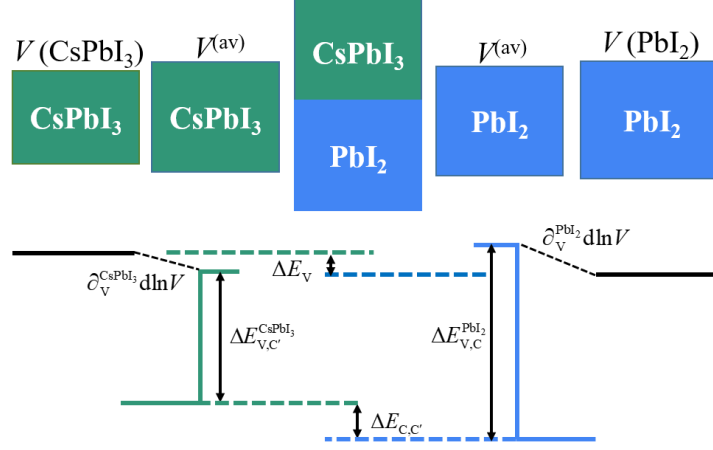

**Fig. S4** The schematics for calculations of valence band offset between  $\text{PbI}_2$  and  $\text{CsPbI}_3$ .

#### 4. Electronic structures of the pristine heterointerfaces

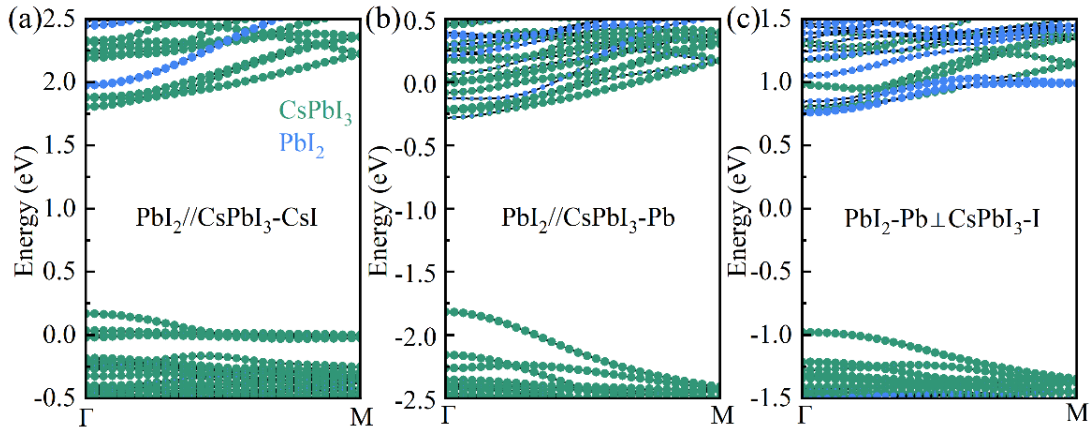

**Fig. S5** Band structures of the three energetically favorable heterointerfaces. (a)  $\text{PbI}_2//\text{CsPbI}_3\text{-CsI}$ , (b)  $\text{PbI}_2//\text{CsPbI}_3\text{-Pb}$  and (c)  $\text{PbI}_2\text{-Pb}\perp\text{CsPbI}_3\text{-I}$ . The green and blue circles represent the contribution of electronic states from the atoms of the  $\text{CsPbI}_3$  and  $\text{PbI}_2$  systems, respectively. The size of the circles indicates the relative contribution of the corresponding atoms to the energy bands. Fermi energy level is set as the reference zero point.

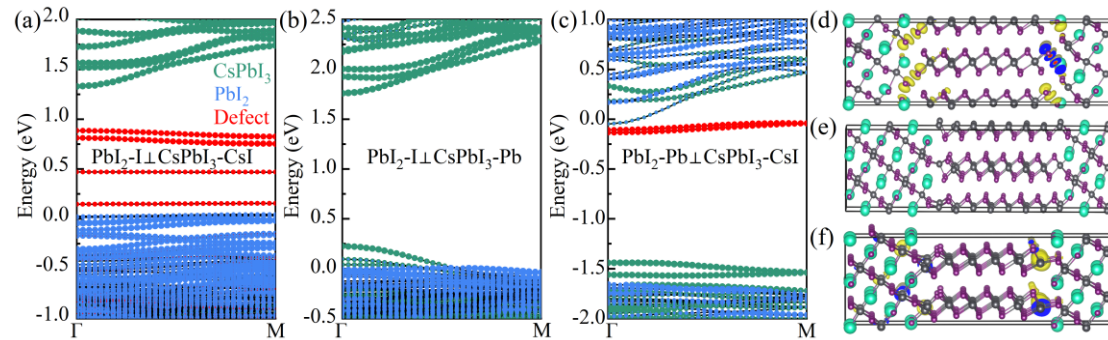



**Fig. S6** Band structures and atomic structures. (a)-(c) band structures of  $\text{PbI}_2\text{-I}\perp\text{CsPbI}_3\text{-CsI}$ ,  $\text{PbI}_2\text{-I}\perp\text{CsPbI}_3\text{-Pb}$  and  $\text{PbI}_2\text{-Pb}\perp\text{CsPbI}_3\text{-CsI}$ , respectively, whose partial charge densities of the interface are shown in (d)-(f), respectively.

The  $\text{PbI}_2\text{-I}\perp\text{CsPbI}_3\text{-CsI}$  heterointerface exhibits several deep defect levels within the band gap, as shown in Fig. S6(a). These defect levels stem from the antibonding states of I-I at the interface depicted in Fig. S6(d). In contrast, the  $\text{PbI}_2\perp\text{CsPbI}_3\text{-Pb}$  heterointerface displays no defect states within the band gap due to the complete saturation of I dangling bonds on the Pb-terminated (1 2 0) plane of  $\text{PbI}_2$  at the surface termination of  $\text{CsPbI}_3$ . The  $\text{PbI}_2\text{-Pb}\perp\text{CsPbI}_3\text{-CsI}$  heterointerface produces several shallow defect levels near the conduction band minimum (CBM) as a result of unpaired electrons from the Pb atoms at the interface, as shown in Fig. S6(f).

### 5. Formation energies of the $V_I$ and $I_i$ defects near and far away from the $\text{PbI}_2\text{-Pb}\perp\text{CsPbI}_3\text{-I}$ heterointerface

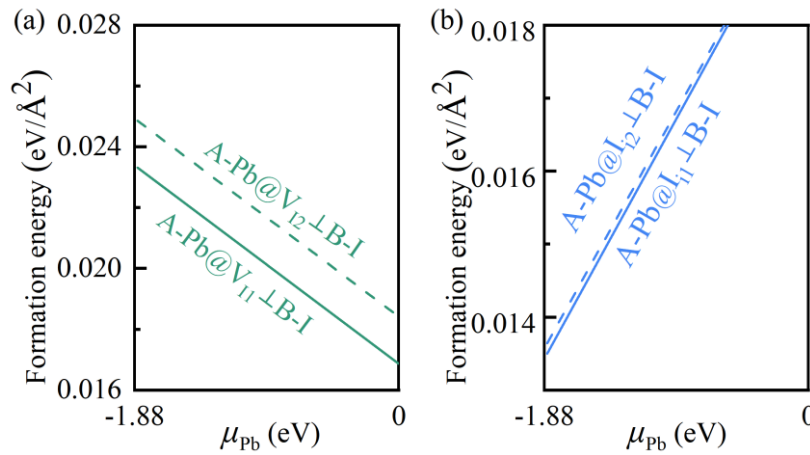

**Fig. S7** The interface formation energy of the  $V_I$  and  $I_i$  defects near (solid lines) and far away (dashed lines) from the  $\text{PbI}_2\text{-Pb}\perp\text{CsPbI}_3\text{-I}$  heterointerface.

### 6. Electronic and atomic structures of the I and Pb related defects in $\text{PbI}_2/\text{CsPbI}_3$ heterointerface

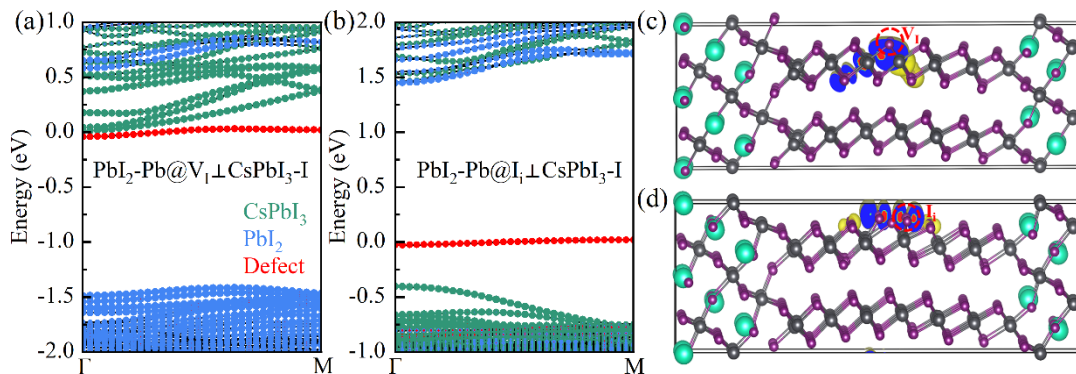

**Fig. S8** Band structures and atomic structures of the  $V_I$  and  $I_i$  defects far away from the  $\text{PbI}_2\text{-Pb}\perp\text{CsPbI}_3\text{-I}$  heterointerface. (a) and (b) The band structures of the  $\text{PbI}_2\text{-Pb}@V_I\perp\text{CsPbI}_3\text{-CsI}$  and  $\text{PbI}_2\text{-Pb}@I_i\perp\text{CsPbI}_3\text{-CsI}$  heterointerfaces, respectively, whose partial charge densities of defects are shown in (c) and (d).

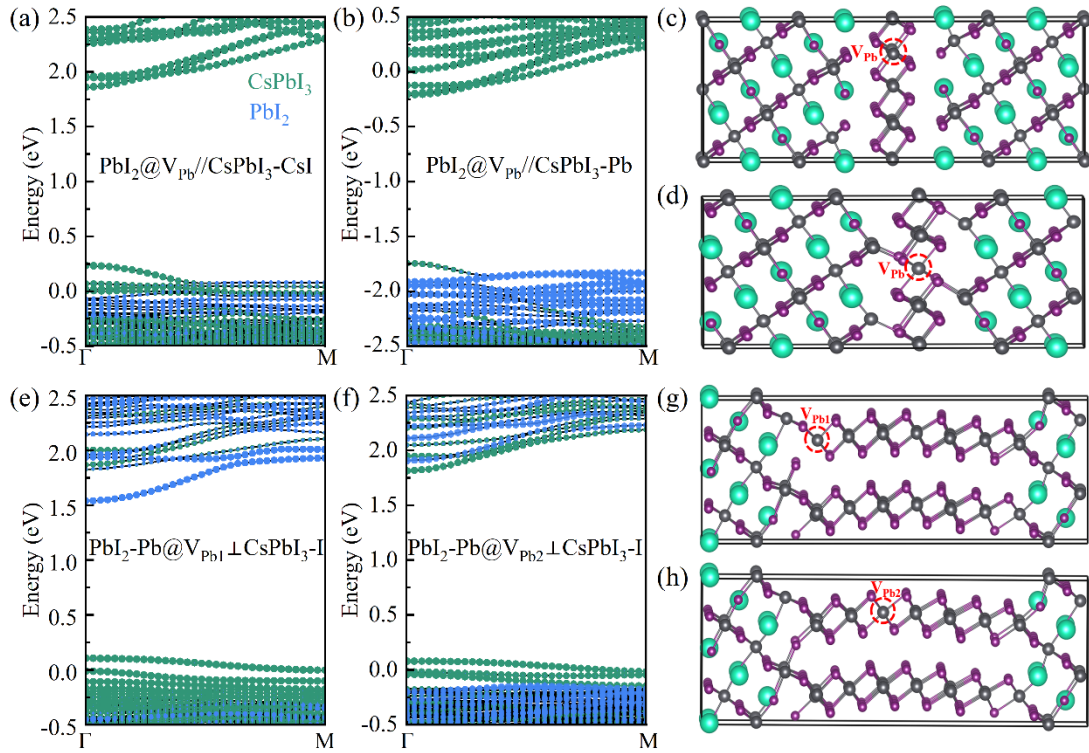

**Fig. S9** Band structures and atomic structures of the defective  $\text{PbI}_2/\text{CsPbI}_3$  heterointerfaces with Pb related defect at the layered  $\text{PbI}_2$ . (a) and (b) The band structures of the  $\text{PbI}_2@V_{\text{pb}}/\text{CsPbI}_3\text{-CsI}$  and  $\text{PbI}_2@V_{\text{pb}}/\text{CsPbI}_3\text{-Pb}$  heterointerfaces, respectively, whose atom structures are shown in (c) and (d). (e) and (f) The band structures of the  $\text{PbI}_2\text{-Pb}@V_{\text{pb}1}\perp\text{CsPbI}_3\text{-I}$  and  $\text{PbI}_2\text{-Pb}@V_{\text{pb}2}\perp\text{CsPbI}_3\text{-I}$  heterointerfaces, respectively, whose atom structures are shown in (g) and (h).

## 7. Band edge energetics and carrier transport

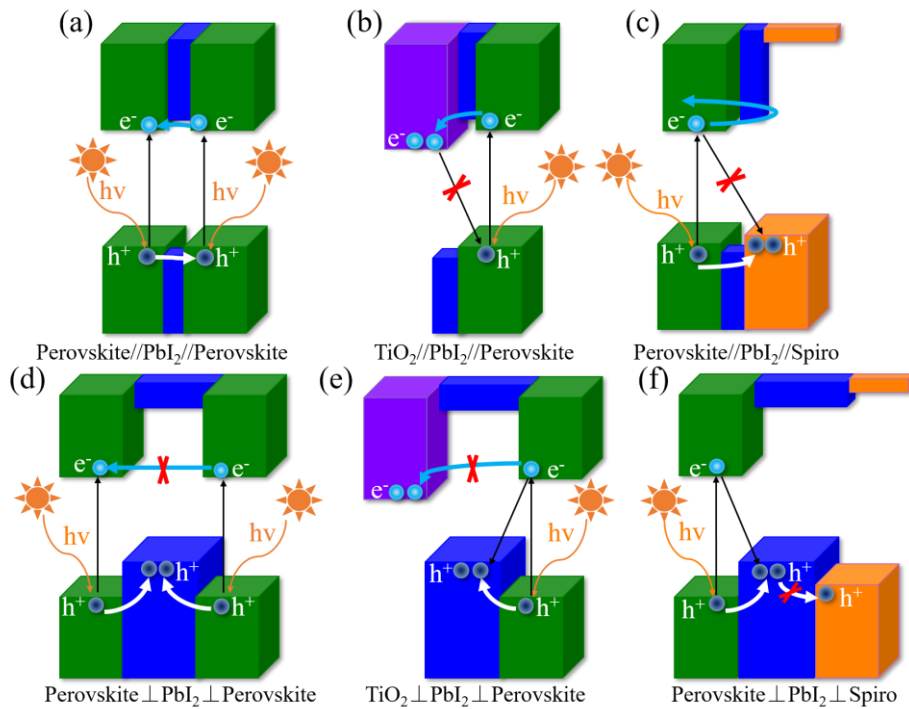

**Fig. S10** Schematic diagrams of band edge energetics illustrating the impacts of intercalating orientation of  $\text{PbI}_2$  on the carrier transfer of PSC. The band edge positions of  $\text{TiO}_2$  (electron transfer layer) and Spiro-OMeTAD (denoted as Spiro, hole transfer layer) relative to those of perovskite are collected from Ref. S2. (a), (b) and (c) show the band alignments of heterojunctions formed by a layered  $\text{PbI}_2$  parallelly intercalated into two perovskite grains, between  $\text{TiO}_2$  and perovskite, and between perovskite and Spiro, respectively. (d), (e) and (f) show the cases of  $\text{PbI}_2$  vertically intercalated into them. The band alignments between perovskite and  $\text{PbI}_2$  are shown in Fig. 2 of the main text.

By analyzing the band edge energetics of  $\text{TiO}_2$  (electron transfer layer) and Spiro-OMeTAD (denoted as Spiro, hole transfer layer) relative to that of perovskite,<sup>S2</sup> the impacts of the intercalating  $\text{PbI}_2$  on carrier transfer in PSC devices are studied. The parallel intercalation of the layered  $\text{PbI}_2$  in perovskite grains (perovskite// $\text{PbI}_2$ //perovskite) does not subsequently hinder the transfer of the photoexcited electrons and holes in the absorber, due to the slightly higher CBM and lower VBM of  $\text{PbI}_2$  than those of perovskite, as shown in Fig. S10(a). To maximize the passivating effect and minimize the hindrance of carrier transfer,  $\text{PbI}_2$  should be processed into multiple thin layers, which can be achieved by the post-treatment with the organic ammonium salts.<sup>S3</sup> On the other hand, the parallel intercalation of  $\text{PbI}_2$  into the electron transfer interface ( $\text{TiO}_2$ // $\text{PbI}_2$ //perovskite) and the hole transfer interface (perovskite// $\text{PbI}_2$ //Spiro) can suppress the interfacial nonradiative recombination as shown in Fig. S10(b) and S10(c). Despite the parallel intercalation of  $\text{PbI}_2$ , the extraction of carriers is not significantly impeded, as the built-in electric fields at the contact interfaces can drive carriers across the low energy barrier of the thin-layered  $\text{PbI}_2$ .

The vertical intercalation of the layered  $\text{PbI}_2$  into perovskite (perovskite $\perp$  $\text{PbI}_2$  $\perp$ perovskite) exhibits a pronounced type-II band alignment as shown in Fig. S10(d). Consequently, both the high barrier height and the great layer thickness impede carrier transfer through the perovskite grains. The  $\text{PbI}_2$  at the electron transfer contact interface ( $\text{TiO}_2$  $\perp$  $\text{PbI}_2$  $\perp$ perovskite) seriously hinders electron extraction due to its high CBM as shown in Fig. S10(e). Furthermore, electrons accumulated at the CBM of perovskite can readily recombine with holes at the high VBM of  $\text{PbI}_2$ . At the hole transfer interface (perovskite $\perp$  $\text{PbI}_2$  $\perp$ Spiro),  $\text{PbI}_2$  efficiently extracts holes from the absorber but obstructs hole transfer to electrode due to its high VBM, as shown in Fig. S10(f). Therefore, despite its passivation benefits, the vertical intercalation of the layered  $\text{PbI}_2$  into PSCs is not a favorable scheme, given the pronounced type-II band alignment and the great layer thickness.

## References

- S1. Y.-H. Li, A. Walsh, S. Chen, W.-J. Yin, J.-H. Yang, J. Li, J. L. F. Da Silva, X. G. Gong and S. Wei, *Appl. Phys. Lett.*, 2009, **94**, 212109.
- S2. S. Akin, Y. Altintas, E. Mutlugun, S. Sonmezoglu, *Nano Energy* 2019, **60**, 557-566.
- S3. X. Jiang, J. Zhang, X. Liu, Z. Wang, X. Guo and C. Li, *Angew. Chem. Int. Ed.* 2022, **61**, e202115663.
